# Supplementary material for: Dysregulation of the miR‐30c/DLL4 axis by circHIPK3 is essential for KSHV lytic replication
Source: PubMed Central journal article supplement (PMC9066072; doi:10.15252/embr.202154117), 2022-03-03
Supplement: EMBR-23-e54117-s001.pdf [file EMBR-23-e54117-s001.pdf]

Figure 4

A

|   | 0        | 16       | 24       | 48       | 72 |
|---|----------|----------|----------|----------|----|
| 1 | 0.913831 | 3.193194 | 3.148929 | 4.053031 |    |
| 1 | 1.094294 | 3.105876 | 3.377526 | 3.815747 |    |
| 1 | 0.852635 | 2.908879 | 3.052598 | 4.292733 |    |

B

|   | 0        | 16       | 24       | 48       | 72 |
|---|----------|----------|----------|----------|----|
| 1 | 0.91067  | 0.972655 | 0.721965 | 0.628507 |    |
| 1 | 0.96929  | 1.082975 | 0.755236 | 0.191445 |    |
| 1 | 0.835088 | 0.939523 | 0.586417 | 0.535887 |    |

C

| GFP | GFP-ORF50 | GFP-ORF57 | RGG1/2   |
|-----|-----------|-----------|----------|
| 1   | 0.959264  | 4.890561  | 2.703822 |
| 1   | 0.598739  | 4.789915  | 2.602684 |
| 1   | 1.261377  | 4.469149  | 2.281528 |

D

| GFP | GFP-ORF50 | GFP-ORF57 | RGG1/2   |
|-----|-----------|-----------|----------|
| 1   | 1.172835  | 0.639493  | 1.049717 |
| 1   | 0.939523  | 0.765779  | 1.012804 |
| 1   | 0.965936  | 0.463294  | 0.750019 |

E

| GFP  | GFP-ORF57 |          |          |          |          |
|------|-----------|----------|----------|----------|----------|
| 4.00 | 0.25      | 0.50     | 1.00     | 2.00     | 4.00     |
| 1    | 1.607702  | 2.353813 | 2.639016 | 3.294364 | 3.07375  |
| 1    | 1.45902   | 1.624505 | 1.965641 | 1.808759 | 1.693491 |
| 1    | 1.735077  | 2.181015 | 2.639016 | 3.182146 | 2.907945 |

D

|           | GFP 16   |          |   | GFP 24   |          |   | GFP-ORF57 16 |          |   | GFP-ORF57 24 |          |   |
|-----------|----------|----------|---|----------|----------|---|--------------|----------|---|--------------|----------|---|
|           | Mean     | SD       | N | Mean     | SD       | N | Mean         | SD       | N | Mean         | SD       | N |
| pre-BTG1  | 0.00467  | 0.007424 | 3 | 0.140315 | 0.127805 | 3 | 1            | 0        | 3 | 1            | 0        | 3 |
| circHIPK3 | 0.087295 | 0.089496 | 3 | 0.069782 | 0.071603 | 3 | 0.912625     | 0.188741 | 3 | 0.651054     | 0.082742 | 3 |
| Linear    |          |          |   |          |          |   |              |          |   |              |          |   |
| HIPK3     | 0.006407 | 0.008249 | 3 | 0.078792 | 0.147203 | 3 | 1.016981     | 0.359196 | 3 | 0.193854     | 0.140109 | 3 |
| GAPDH     | 0.083626 | 0.057282 | 3 | 0.059233 | 0.044853 | 3 | 0.159921     | 0.021251 | 3 | 0.150347     | 0.076598 | 3 |
