# Supplementary material for: Dysregulation of the miR‐30c/DLL4 axis by circHIPK3 is essential for KSHV lytic replication
Source: PubMed Central journal article supplement (PMC9066072; doi:10.15252/embr.202154117), 2022-03-03
Supplement: EMBR-23-e54117-s002.pdf [file EMBR-23-e54117-s002.pdf]

Figure 2

A

| 0hr | 24hr     |
|-----|----------|
| 1   | 3.24901  |
| 1   | 2.685145 |
| 1   | 2.741566 |

B

| 0hr | 24hr     |
|-----|----------|
| 1   | 0.939523 |
| 1   | 0.972655 |
| 1   | 1.028114 |

D

| IgG scr | Ago2 scr | Ago2 miR-29b | Ago2 miR-30c | IgG scr | Ago2 scr | Ago2 + AntagomiR |
|---------|----------|--------------|--------------|---------|----------|------------------|
| 1       | 5.105061 | 17.9005      | 15.52938     | 1       | 7.684376 | 3.07375          |
| 1       | 10.75494 | 6.04997      | 34.2238      | 1       | 13.94744 | 2.114036         |
| 1       | 8.321987 | 11.48698     | 22.81527     | 1       | 9.598814 | 3.077861         |

E

| miR-29b  |           | miR-30c  |           |
|----------|-----------|----------|-----------|
| GAPDH    | circHIPK3 | GAPDH    | circHIPK3 |
| 0.389582 | 1         | 0.378931 | 1         |
| 0.562529 | 1         | 0.299401 | 1         |
| 0.087171 | 1         | 0.420168 | 1         |
| 0.006615 | 1         | 0.241546 | 1         |
