# Supplementary material for: Dysregulation of the miR‐30c/DLL4 axis by circHIPK3 is essential for KSHV lytic replication
Source: PubMed Central journal article supplement (PMC9066072; doi:10.15252/embr.202154117), 2022-03-03
Supplement: EMBR-23-e54117-s003.pdf [file EMBR-23-e54117-s003.pdf]

Figure 6

A

|    | Scr      |         |          | KD 1     |          |          | KD 2     |          |          |
|----|----------|---------|----------|----------|----------|----------|----------|----------|----------|
| 0  | 1        | 1       | 1        | 0.382889 | 0.840896 | 0.343885 | 1.647182 | 0.680657 | 0.558644 |
| 24 | 6.453134 | 6.84476 | 6.892369 | 2.557971 | 2.505329 | 2.989698 | 2.378414 | 2.020903 | 3.784231 |

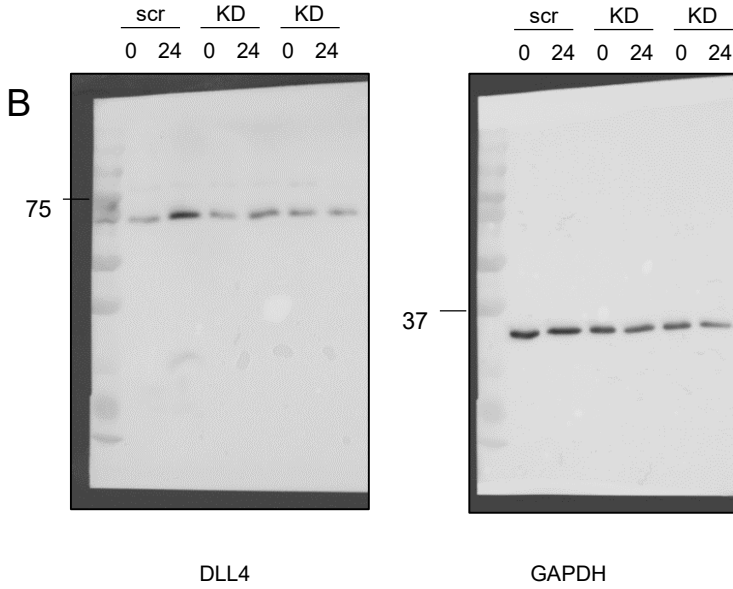

**C**

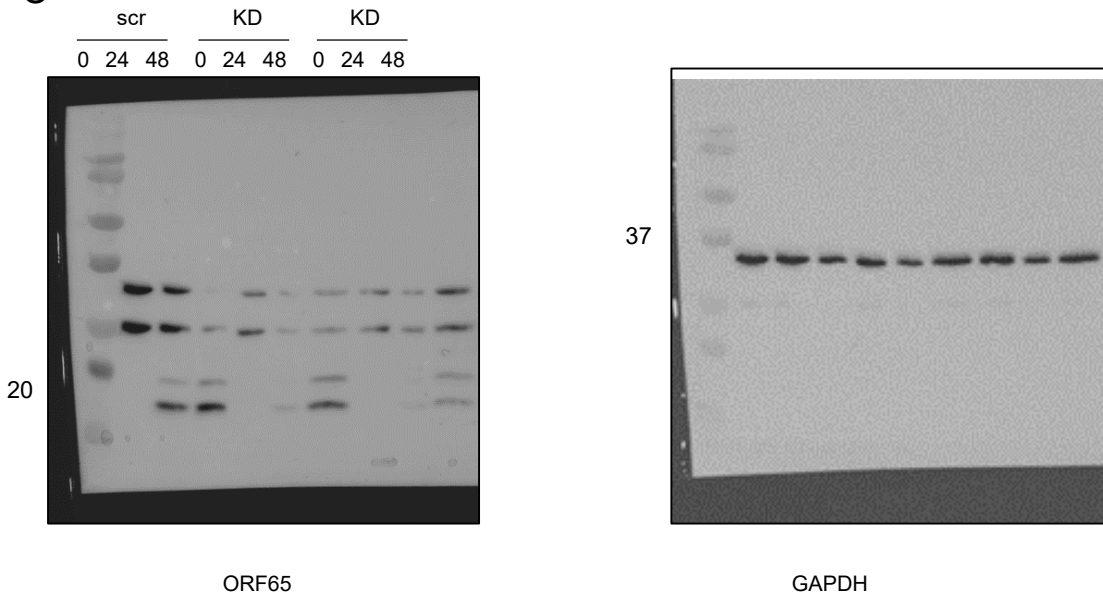

**D**

| Latent   | scr | DLL4 KD 1 | DLL4 KD 2 |
|----------|-----|-----------|-----------|
| 0.167822 | 1   | 0.447513  | 0.510506  |
| 0.065607 | 1   | 0.493116  | 0.78187   |
| 0.095061 | 1   | 0.351111  | 0.543367  |

**E**

| Latent   | scr | DLL4 KD 1 | DLL4 KD 2 |
|----------|-----|-----------|-----------|
| 0.015843 | 1   | 0.099787  | 0.21299   |
| 0.017444 | 1   | 0.100134  | 0.451831  |
| 0.122428 | 1   | 0.093354  | 0.099787  |
