# Supplementary material for: Dysregulation of the miR‐30c/DLL4 axis by circHIPK3 is essential for KSHV lytic replication
Source: PubMed Central journal article supplement (PMC9066072; doi:10.15252/embr.202154117), 2022-03-03
Supplement: EMBR-23-e54117-s004.pdf [file EMBR-23-e54117-s004.pdf]

Figure 3

A

| scr |          | KD       |          |
|-----|----------|----------|----------|
| 0   | 24       | 0        | 24       |
| 1   | 4.924578 | 0.806642 | 0.949342 |
| 1   | 3.375263 | 0.413225 | 1.010451 |
| 1   | 4.96     | 0.898132 | 0.803851 |

B

| scr |          | KD       |          |
|-----|----------|----------|----------|
| 0   | 24       | 0        | 24       |
| 1   | 1.075494 | 1.136817 | 1.156688 |
| 1   | 0.768438 | 1.035265 | 0.962594 |
| 1   | 1.239708 | 1.558329 | 0.933033 |

C

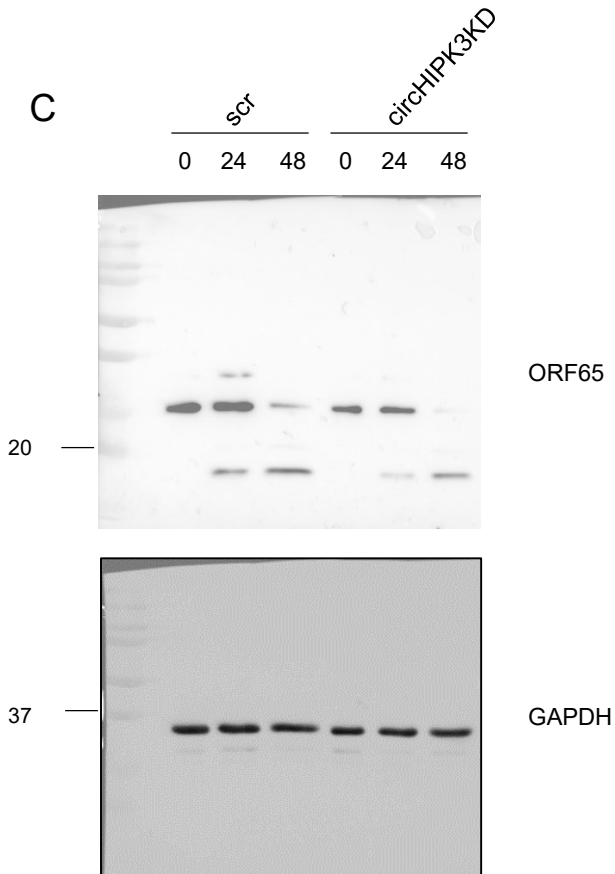

D

| Latent   | Scr | circHIPK3<br>KD |
|----------|-----|-----------------|
| 0.143091 |     | 1 0.455335      |
| 0.060162 |     | 1 0.596668      |
| 0.119493 |     | 1 0.430773      |

E

| Latent   | Scr | circHIPK3<br>KD |
|----------|-----|-----------------|
| 0.03901  |     | 1 0.381565      |
| 0.006872 |     | 1 0.151774      |
| 0.100481 |     | 1 0.380245      |

F

|     |    | miR-29b  |          |          | miR-30c  |          |          | miR-27a  |          |          |
|-----|----|----------|----------|----------|----------|----------|----------|----------|----------|----------|
|     |    | 0        | 1        | 1        | 1        | 1        | 1        | 1        | 1        | 1        |
| Scr | 24 | 0.380245 | 0.263401 | 0.225313 | 0.598739 | 0.379436 | 0.287175 | 0.231647 | 0.486327 | 0.236514 |
|     | 0  | 1.520979 | 1.563739 | 1.031683 | 0.913831 | 1.351911 | 1.328686 | 0.913831 | 0.926588 | 0.96929  |
| KD  | 24 | 1.248331 | 1.585568 | 0.885768 | 1.765406 | 1.328686 | 1.494849 | 0.158769 | 0.145088 | 0.325825 |
