# Supplementary material for: Dysregulation of the miR‐30c/DLL4 axis by circHIPK3 is essential for KSHV lytic replication
Source: PubMed Central journal article supplement (PMC9066072; doi:10.15252/embr.202154117), 2022-03-03
Supplement: EMBR-23-e54117-s006.pdf [file EMBR-23-e54117-s006.pdf]

# Figure 1

D

|          | miR-29b |          | miR-30c |          |
|----------|---------|----------|---------|----------|
|          | 0hr     | 24hr     | 0hr     | 24hr     |
| Repeat 1 | 1       | 0.175556 | 1       | 0.285191 |
| Repeat 2 | 1       | 0.267016 | 1       | 0.354781 |
| Repeat 3 | 1       | 0.243164 | 1       | 0.213324 |

E

|          | Pri-miR-29b |          | Pri-miR-30c |          |
|----------|-------------|----------|-------------|----------|
|          | 0hr         | 24hr     | 0hr         | 24hr     |
| Repeat 1 | 1           | 1.71119  | 1           | 0.815072 |
| Repeat 2 | 1           | 1.287882 | 1           | 1.128964 |
| Repeat 3 | 1           | 1.205808 | 1           | 0.707107 |

F

|          | Pre-miR-29b |          | Pre-miR-30c |          |
|----------|-------------|----------|-------------|----------|
|          | 0hr         | 24hr     | 0hr         | 24hr     |
| Repeat 1 | 1           | 1.328686 | 1           | 0.80107  |
| Repeat 2 | 1           | 1.010451 | 1           | 1.347234 |
| Repeat 3 | 1           | 1.552938 | 1           | 1.827663 |

G

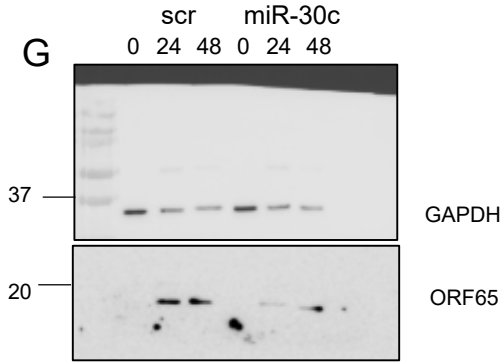

H

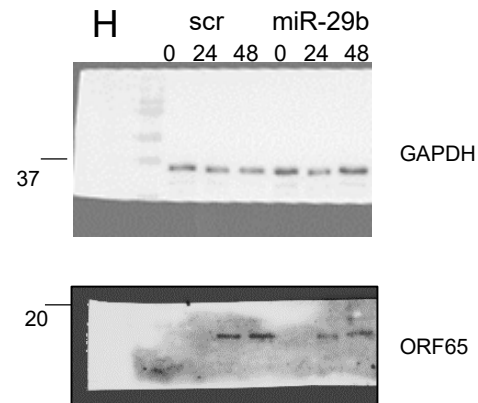

I

| Latent   | scr | miR-30c  |
|----------|-----|----------|
| 0.081334 | 1   | 0.30566  |
| 0.07668  | 1   | 0.279322 |
| 0.076947 | 1   | 0.222211 |

J

| Latent   | scr | miR-30c  |
|----------|-----|----------|
| 0.053034 | 1   | 0.305668 |
| 0.063728 | 1   | 0.588469 |
| 0.062633 | 1   | 0.260623 |
