# Supplementary material for: Dysregulation of the miR‐30c/DLL4 axis by circHIPK3 is essential for KSHV lytic replication
Source: PubMed Central journal article supplement (PMC9066072; doi:10.15252/embr.202154117), 2022-03-03
Supplement: EMBR-23-e54117-s007.pdf [file EMBR-23-e54117-s007.pdf]

Figure 5

A

| 0 | 24       |
|---|----------|
| 1 | 8.603955 |
| 1 | 8.083612 |
| 1 | 8.058697 |

B

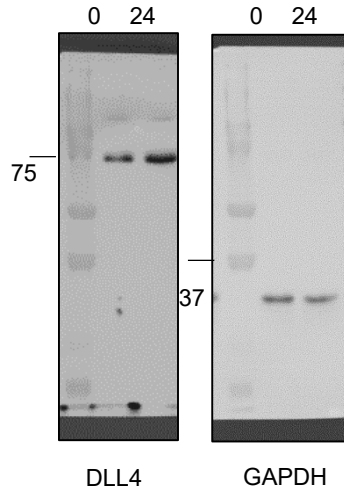

C

|    |          | scr          |          |  |
|----|----------|--------------|----------|--|
| 0  | 1        | 1            | 1        |  |
| 24 | 8.083612 | 8.058697     | 6.475538 |  |
|    |          | circHIPK3 KD |          |  |
| 0  | 0.675974 | 0.300925     | 0.320295 |  |
| 24 | 3.986161 | 1.168777     | 2.049114 |  |

D

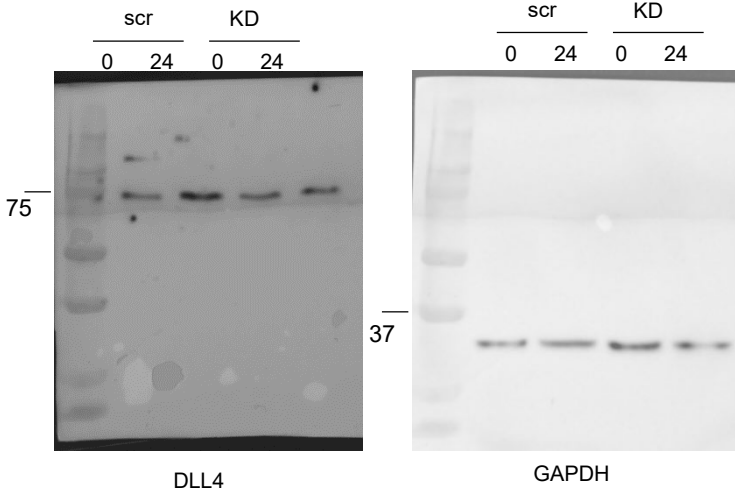

E

|    |          | scr      |          |  |
|----|----------|----------|----------|--|
| 0  | 1        | 1        | 1        |  |
| 24 | 7.361501 | 12.21914 | 10.28225 |  |
|    |          | miR-30c  |          |  |
| 0  | 0.180491 | 0.181118 | 0.397768 |  |
| 24 | 1.70527  | 1.068065 | 0.939523 |  |

F

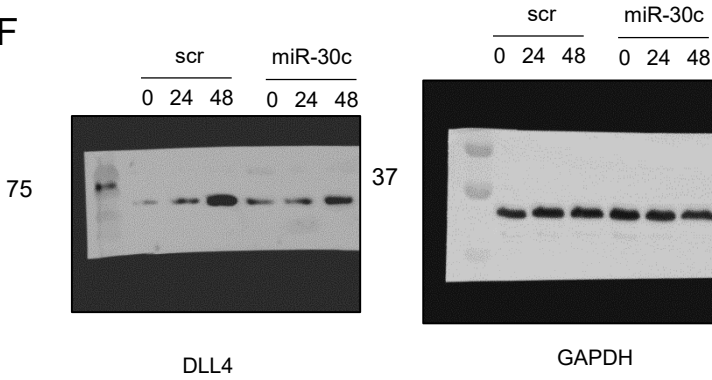

|         |    |          |          |          |
|---------|----|----------|----------|----------|
| Scr     | 0  | 1        | 1        | 1        |
|         | 24 | 1.998341 | 1.266441 | 1.319536 |
|         | 48 | 2.709761 | 1.681993 | 2.957234 |
| miR-30c | 0  | 0.242681 | 0.206852 | 0.694378 |
|         | 24 | 0.469367 | 0.467275 | 0.472015 |
|         | 48 | 0.781139 | 0.656711 | 0.623932 |

G

| GAPDH | DLL4     |
|-------|----------|
| 1     | 22.7848  |
| 1     | 15.13692 |
| 1     | 12.77277 |

H

|    |          | Scr      |          |          | miR-30c  |          |  |
|----|----------|----------|----------|----------|----------|----------|--|
| 10 | 1        | 1        | 1        | 0.620331 | 0.630942 | 0.441696 |  |
| 20 | 0.902043 | 0.810602 | 1.060757 | 0.425295 | 0.496663 | 0.313365 |  |
| 50 | 0.880873 | 1.135238 | 1.06284  | 0.232501 | 0.253651 | 0.36737  |  |

I

|    |          | Scr               |          |  |
|----|----------|-------------------|----------|--|
| 0  | 1        | 1                 | 1        |  |
| 24 | 6.110741 | 5.063026          | 6.088402 |  |
|    |          | miR-30c AntagomiR |          |  |
| 0  | 1.580083 | 1.270151          | 1.515677 |  |
| 24 | 7.808254 | 7.209816          | 8.723835 |  |

J

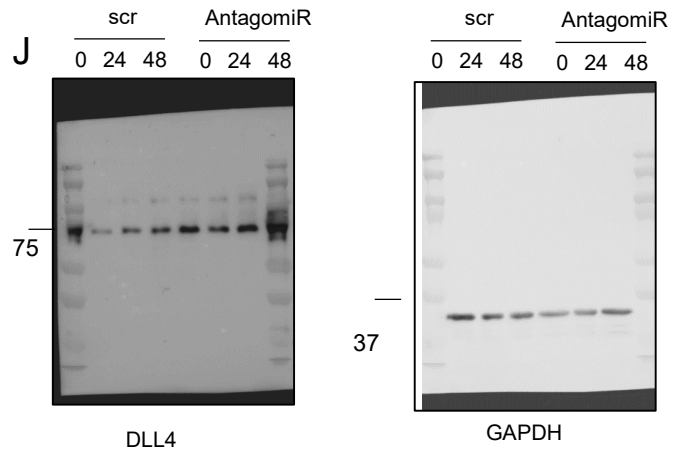

K

| IgG      | Ago2     | Ago2 + AntagomiR |
|----------|----------|------------------|
| 0.047102 | 49.76047 | 4.948283         |
| 0.000912 | 46.42816 | 10.03472         |
| 0.493776 | 37.40087 | 2.842042         |

L

| Scr | 20nM     | 40nM     |
|-----|----------|----------|
| 1   | 1.233693 | 1.512903 |
| 1   | 1.138025 | 1.371298 |
| 1   | 1.118553 | 1.262132 |
