# Supplementary material for: Dysregulation of the miR‐30c/DLL4 axis by circHIPK3 is essential for KSHV lytic replication
Source: PubMed Central journal article supplement (PMC9066072; doi:10.15252/embr.202154117), 2022-03-03
Supplement: EMBR-23-e54117-s008.pdf [file EMBR-23-e54117-s008.pdf]

## **Appendix Contents**

Appendix Figure S1: pg 2

Appendix Figure S2: pg 4

Appendix Figure S3: pg 5

Appendix Figure S4: pg 6

Appendix Figure S5: pg 7

Appendix Figure S6: pg 8

Appendix Figure S7: pg 10

Appendix Table S1: pg 11

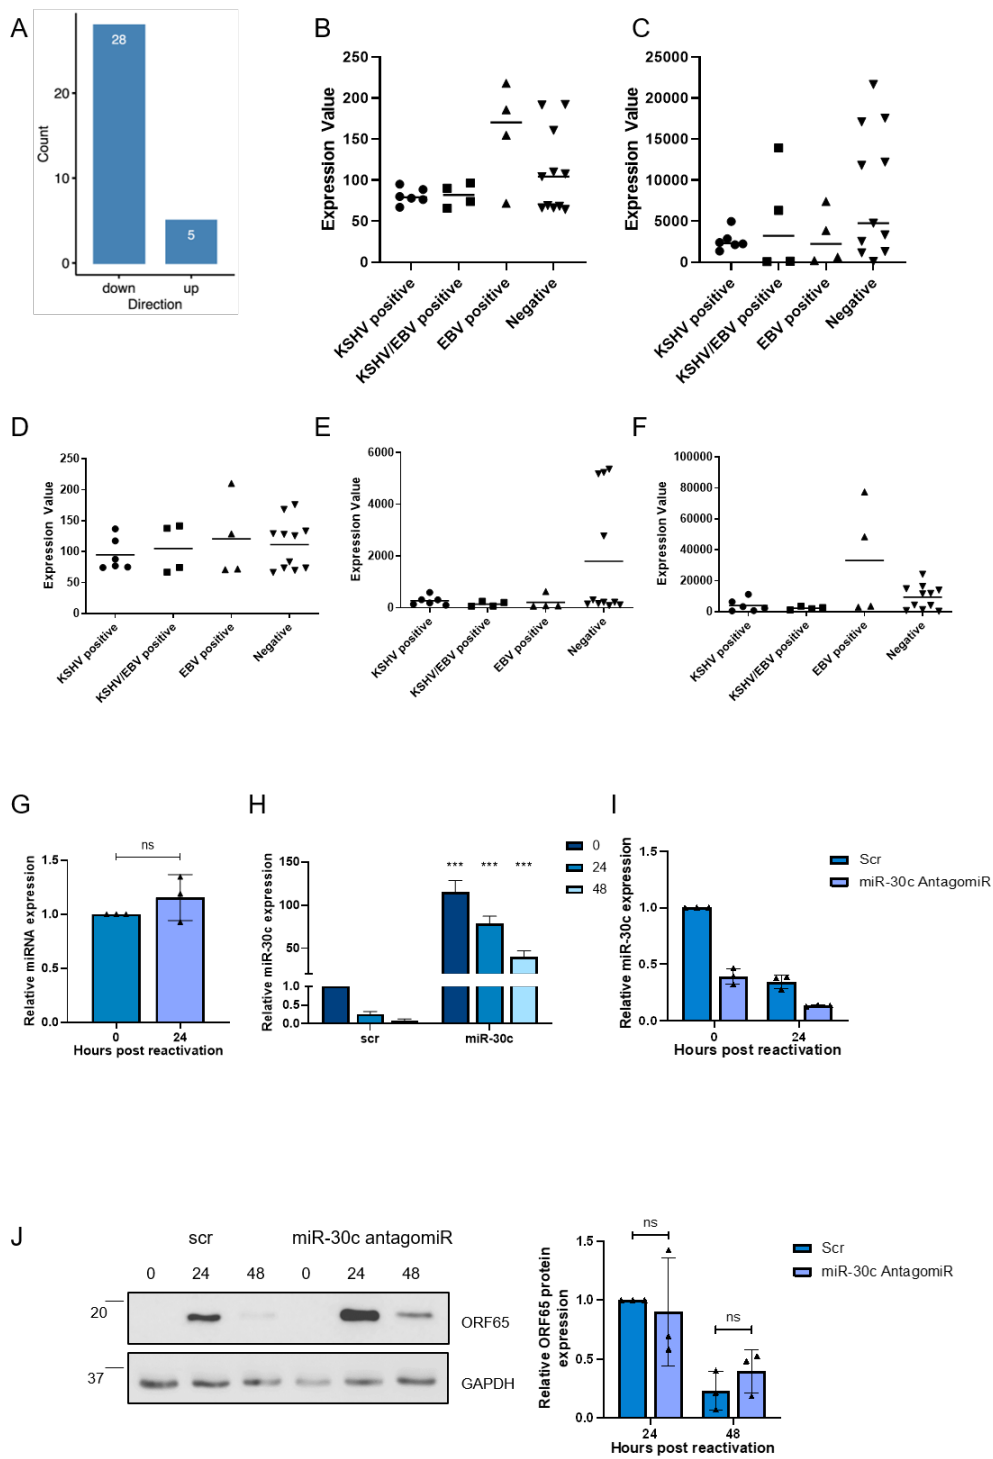

### Appendix Figure S1:

(A) Bar plot of the direction of the 23 differentially expressed miRNAs identified using miR-Seq during KSHV replication

**(B-F)** Scatter plot data of miRNAs from GSE18437 with KSHV positive samples (n=6), KSHV + EBV positive samples (n=4), EBV positive samples (n=4) and KSHV + EBV negative samples (n=11). miRNAs are in order: miR-30c **(B)**, miR-29b **(C)**, miR-128 **(D)**, miR-27 **(E)** and miR-92 **(F)**.

**(G)** qPCR analysis of levels of miR-29b-3p at 0 and 24 hours post-induction in TReX cells. SNORD68 was used as a housekeeper (n=3).

**(H)** qPCR analysis of miR-30c levels, TReX cells were transfected with a scrambled control or a miR-30c mimic before lytic replication induced 24 hours after transfection. miR-30c levels were analysed at 0, 24 and 48 hours post lytic induction. SNORD68 was used as a housekeeper (n=3).

**(I)** qPCR analysis of miR-30c levels after transfection with a scrambled control or a miR-30c antagomiR. 24 hours post transfection the TReX, cells were induced (n=3).

**(J)** Representative western blot of ORF65 levels at 0, 24 and 48 hours post induction in TReX cells. 24 hours prior to induction cells were transfected with either a scrambled control or a miR-30c antagomiR. GAPDH was used as a loading control. Densitometry analysis is n=3.

Data information: In G-J data are presented as mean  $\pm$  SD. \*P<0.05, \*\*P<0.01, \*\*\*P<0.001 (Unpaired Student's t-test). All repeats are biological.

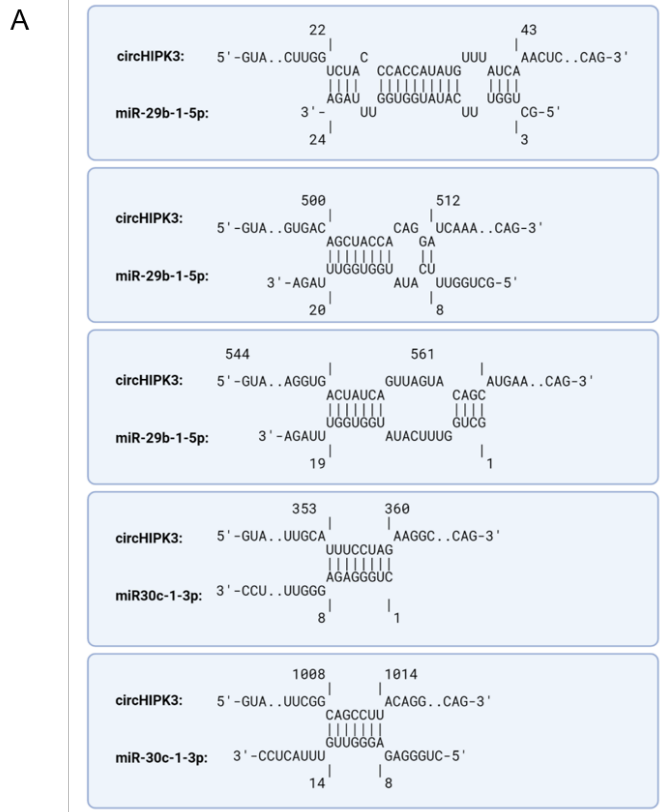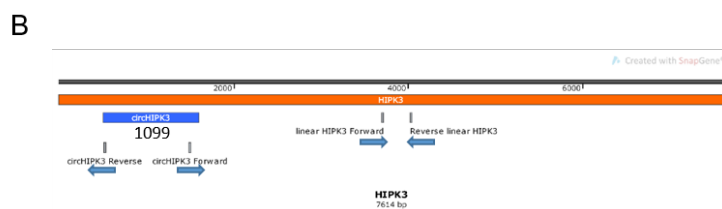

### Appendix Figure S2:

**(A)** RNA binding predictions for circHIPK3 and miR-29b/miR-30c

**(B)** Schematic of the *HIPK3* gene with location of the circHIPK3 and primer sets used marked. Created using SnapGene software.

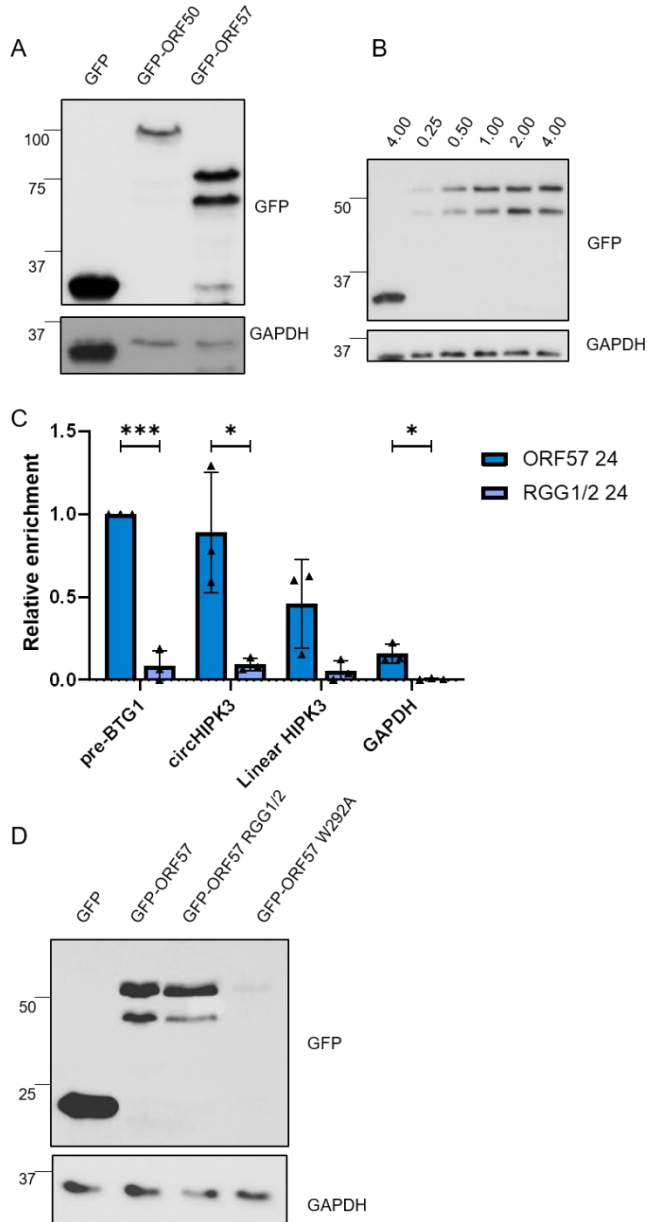

### Appendix Figure S3:

**(A)** Western blot for GFP at 24 hours post-transfection in HEK-293Ts of GFP, GFP-ORF50 and GFP-ORF57. GAPDH was used as a loading control.

**(B).** Western blot for GFP at 24 hours post-transfection in HEK-293Ts of 4 µg GFP or varying amounts of GFP-ORF57.

**(C)** qPCR analysis GFP RIPs in GFP-ORF57 or GFP-ORF57 RGG1/2 transfected HEK-293Ts at 24 hours (n=3).

**(D)** Western blot for GFP at 24 hours post-transfection in HEK-293Ts of GFP, GFP-ORF57, GFP-ORF57 RGG1/2 and GFP-ORF57 W292A. GAPDH was used as a loading control.

Data information: In C data are presented as mean  $\pm$  SD. \*P<0.05, \*\*P<0.01, \*\*\*P<0.001 (Unpaired Student's t-test). All repeats are biological.

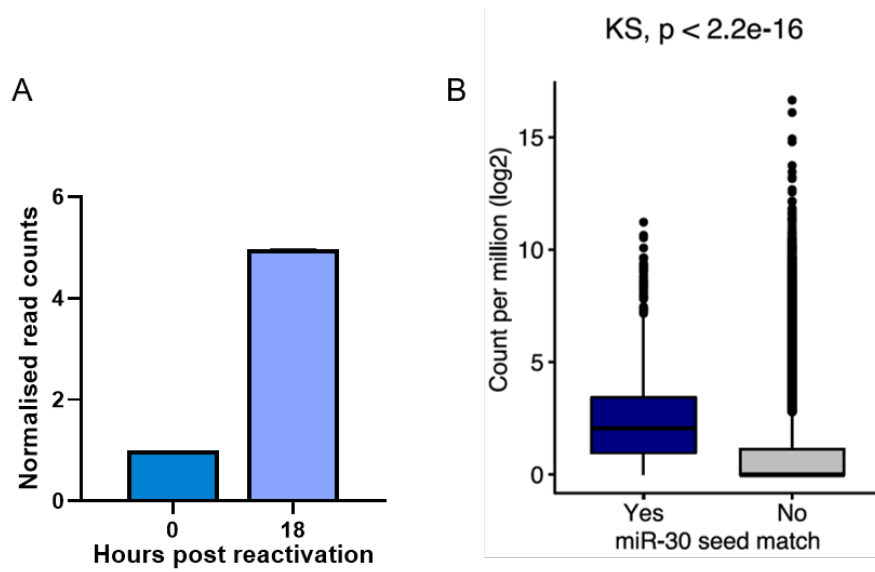

**Appendix Figure S4:**

**(A)** Levels of *DLL4* in mRNA Seq at 0 and 18 hours normalised to read count at 0hrs. N=2

**(B)** Box plot of the mRNA expression levels (CPM) between miR-30 targets and rest during KSHV replication at 20 hours. Two sample Kolmogorov-Smirnov test (KS, p) is indicated on top of the figure.

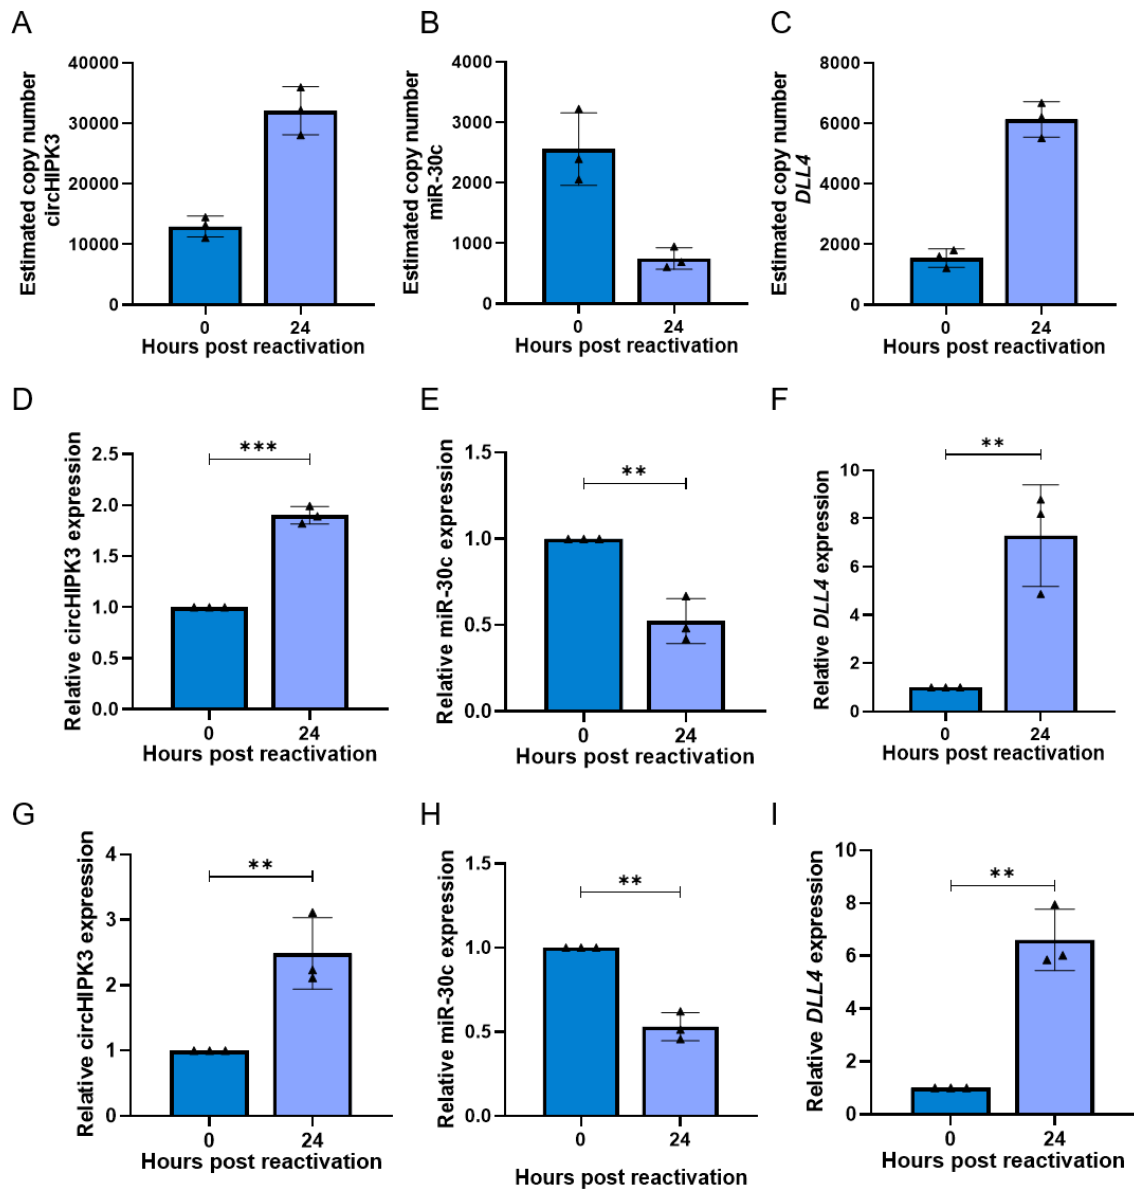

### Appendix Figure S5:

(A-C) Copy number estimates per 5 ng TREx-BCBL-1-Rta cells RNA, calculated using the standard curve method for circHIPK3 (A) miR-30c (B) and *DLL4* (C). (n=3).

(D-F) qPCR analysis of circHIPK3 (D), miR-30c (E) and *DLL4* (F) at 0 and 24 hours post lytic induction in HEK-293T-rKSHV.219 cells. GAPDH was used as a housekeeper for circHIPK3 and *DLL4* while SNORD68 was used as a housekeeper for miR-30c (n=3).

(G-I) qPCR analysis of circHIPK3 (G), miR-30c (H) and *DLL4* (I) at 0 and 24 hours post lytic induction in BC-3 cells. GAPDH was used a housekeeper. (n=3)

Data information: In A-I data are presented as mean  $\pm$  SD. \*P<0.05, \*\*P<0.01, \*\*\*P<0.001 (Unpaired Student's t-test). All repeats are biological.

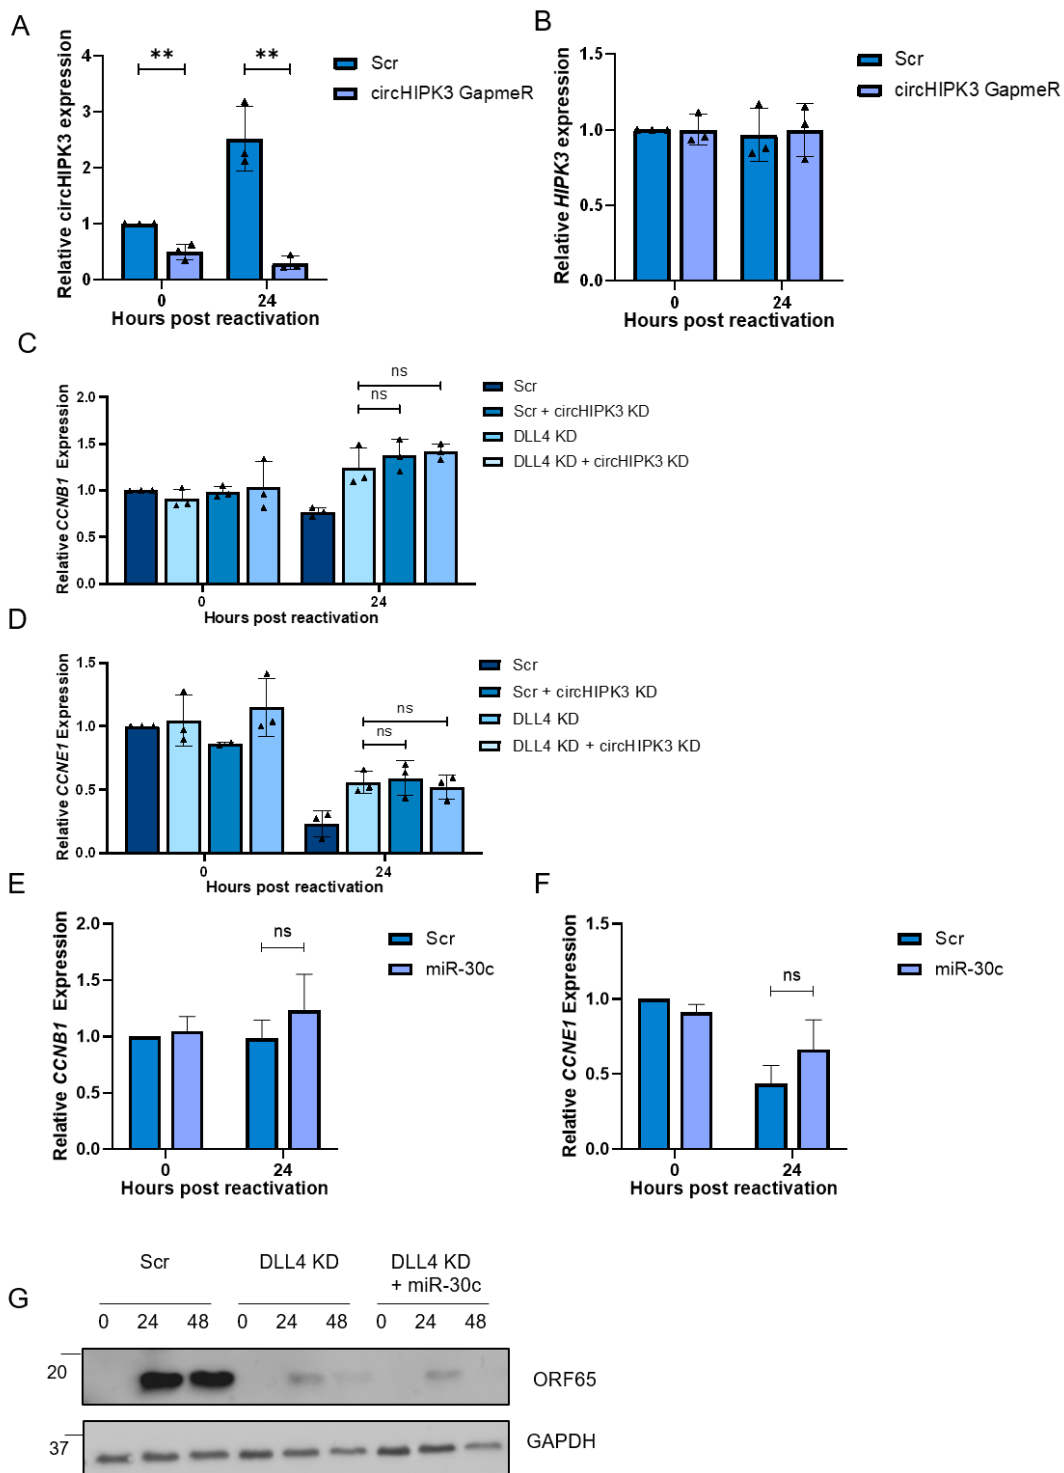

**Appendix Figure S6:**

**(A)** qPCR analysis of circHIPK3 levels in scr and circHIPK3 GapmeR treated TReX cells at 0 and 24 hours post lytic induction. GAPDH was used as a housekeeper (n=3).



**(B)** qPCR analysis of *HIPK3* levels in scr and circHIPK3 GapmeR treated TReX cells. GAPDH was used as a housekeeper (n=3).

**(C)** qPCR analysis of *CCNB1* expression in circHIPK3 and DLL4 KD TReX cells at 0 and 24 hours post lytic induction. GAPDH was used as a housekeeper (n=3).

**(D)** qPCR analysis of *CCNE1* expression in circHIPK3 and DLL4 KD TReX cells at 0 and 24 hours post lytic induction. GAPDH was used as a housekeeper (n=3).

**(E)** qPCR analysis of *CCNB1* expression in DLL4 KD cell lines transfected with either a scrambled control or miR-30c mimic 24 hours prior to lytic induction. GAPDH was used as a housekeeper (n=3).

**(F)** qPCR analysis of *CCNE1* expression in DLL4 KD cell lines transfected with either a scrambled control or miR-30c mimic 24 hours prior to lytic induction. GAPDH was used as a housekeeper (n=3).

**(G)** Representative western blot of scr or miR-30c transfected DLL4 KD TReX cells analysed for ORF65 expression at 0, 24 and 48 hours post lytic induction with GAPDH as a loading control. (n=3).

Data information: In A-F data are presented as mean  $\pm$  SD. \*P<0.05, \*\*P<0.01, \*\*\*P<0.001 (Unpaired Student's t-test). All repeats are biological.

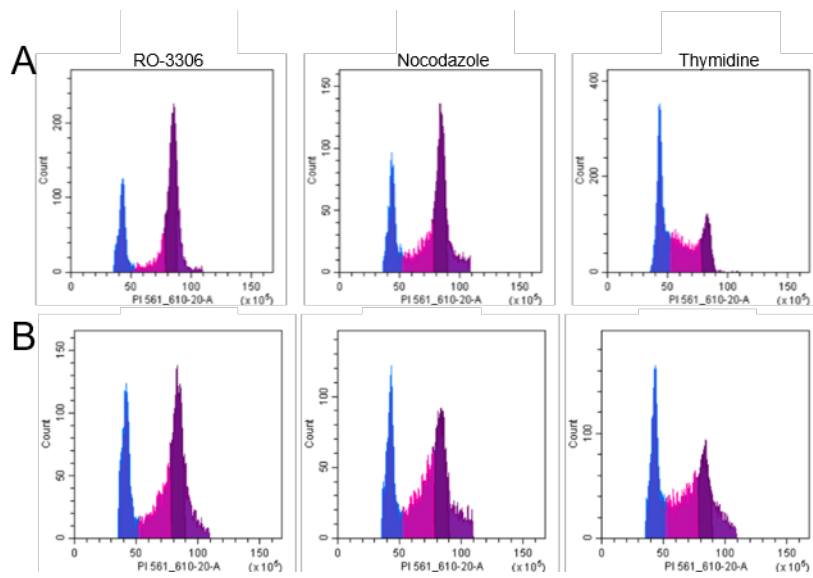

**Appendix Figure S7:**

**(A-B)** Representative plots of cell cycle distribution at 0 **(A)** and 24 **(B)** hours post induction in RO-3306, nocodazole and thymidine treated TReX cells, with G1 phase (blue), S phase (pink) and G2/M phase (purple) highlighted.

| Primer Name                 | Sequence                   |
|-----------------------------|----------------------------|
| <i>GAPDH</i> Forward        | TGTCAGTGGTGGACCTGA         |
| <i>GAPDH</i> Reverse        | GTGGTCGTTGAGGGCAATG        |
| circHIPK3 Forward           | TATGTTGGTGGATCCTGTTCCGCA   |
| circHIPK3 Reverse           | TGGTGGGTAGACCAAGAGTGGTGA   |
| <i>ORF57</i> Forward        | GCCATAATCAAGCGTACTGG       |
| <i>ORF57</i> Reverse        | GCAGAGAAATATTGCGGTGT       |
| <i>DLL4</i> Forward         | CCCTGGCAATGTACTIONTGTGAT   |
| <i>DLL4</i> Reverse         | TGGTGGGTGCAGTAGTTG         |
| Pri-miR-29b Forward         | TGAAAGCAACAGCAGGATGG       |
| Pri-miR-29b Reverse         | ACCCAAGACAACCTAGAAAGGA     |
| Pre-miR-29b Forward         | TTGCCACTTGAGTCTGTT         |
| Pre-miR-29b Reverse         | CTTCTCTACTGTCACCTCTC       |
| Pri-miR-30c Forward         | CTGATCAACCCTGGACCCTG       |
| Pri-miR-30c Reverse         | GGTCGCATTCTGTCCGATCT       |
| Pre-miR-30c Forward         | GTGTAACATCCTACACTCTCAGC    |
| Pre-miR-30c Reverse         | TGGCAGAAGGAGTAAACAACCC     |
| Linear <i>HIPK3</i> Forward | GGCATCAAGAGTGGAAATGGA      |
| Linear <i>HIPK3</i> Reverse | TGATGAATGGTTGGGGATGG       |
| Pre-BTG1 Forward            | GTCAACGGCACAATTAACAG       |
| Pre-BTG1 Reverse            | TGCACACAATGGAGTTGATG       |
| <i>CCNB1</i> Forward        | CATGGTGCACCTTCCTCCTT       |
| <i>CCNB1</i> Reverse        | AGGTAATGTTGTAGAGTTGGTGTCC  |
| <i>CCNE1</i> Forward        | CCACACCTGACAAAGAAGATCATCAC |
| <i>CCNE1</i> Reverse        | GAGCCTCTGGATGGTGCAATA      |
| <i>DLL4</i> KD 1 siRNA      | GCAAGAAGCGCAATGACCACT      |
| <i>DLL4</i> KD 2 siRNA      | GCAGGGAAGCCATGAACAACCT     |
| circHIPK3 KD siRNA          | CTACAGGTATGGCCTCACA        |

**Appendix Table S1:**

Primer and siRNAs Sequences
