# Supplementary material for: Dysregulation of the miR‐30c/DLL4 axis by circHIPK3 is essential for KSHV lytic replication
Source: PubMed Central journal article supplement (PMC9066072; doi:10.15252/embr.202154117), 2022-03-03
Supplement: EMBR-23-e54117-s009.pdf [file EMBR-23-e54117-s009.pdf]

Figure 7

A

|    | Scr      |         |          | circHIPK3 KD |          |          | DLL4 KD  |          |          |
|----|----------|---------|----------|--------------|----------|----------|----------|----------|----------|
| 0  | 1        | 1       | 1        | 0.888843     | 1.333299 | 1.552938 | 1.075494 | 1.126733 | 1.082975 |
| 24 | 0.773782 | 0.68302 | 0.817902 | 1.226885     | 1.205808 | 0.972655 | 1.164734 | 1.414214 | 0.91067  |

B

|    | Scr     |          |          | circHIPK3 KD |          |         | DLL4 KD  |          |          |
|----|---------|----------|----------|--------------|----------|---------|----------|----------|----------|
| 0  | 1       | 1        | 1        | 0.989657     | 1.193336 | 1       | 0.812252 | 0.993092 | 0.986233 |
| 24 | 0.25349 | 0.243164 | 0.273573 | 0.427798     | 0.724471 | 0.41466 | 0.372419 | 0.369847 | 0.382889 |

C

|    | scr      |          |   | circHIPK3 KD |          |   | DLL4 KD  |          |   |
|----|----------|----------|---|--------------|----------|---|----------|----------|---|
|    | Mean     | SD       | N | Mean         | SD       | N | Mean     | SD       | N |
| G1 | 1.14023  | 0.171075 | 3 | 0.990723     | 0.178196 | 3 | 1.152885 | 0.125927 | 3 |
| S  | 0.938608 | 0.291243 | 3 | 1.014528     | 0.120517 | 3 | 0.881231 | 0.152468 | 3 |
| G2 | 0.586319 | 0.073607 | 3 | 0.895598     | 0.1304   | 3 | 0.795677 | 0.076647 | 3 |

D

|    | scr      |          |   | circHIPK3 KD |          |   | DLL4 KD  |          |   |
|----|----------|----------|---|--------------|----------|---|----------|----------|---|
|    | Mean     | SD       | N | Mean         | SD       | N | Mean     | SD       | N |
| G1 | 0.986391 | 0.19524  | 3 | 0.923999     | 0.082129 | 3 | 1.034594 | 0.077817 | 3 |
| S  | 1.030178 | 0.313554 | 3 | 1.054191     | 0.180973 | 3 | 0.975614 | 0.255266 | 3 |
| G2 | 0.577952 | 0.001185 | 3 | 0.841509     | 0.03356  | 3 | 0.853928 | 0.146794 | 3 |

E

|    | Untreated |          |         | RO 3306  |          |          | Nocodazole |          |          | Thymidine |          |          |
|----|-----------|----------|---------|----------|----------|----------|------------|----------|----------|-----------|----------|----------|
| 0  | 0.064704  | 0.098755 | 0.06527 | 0.075887 | 0.103665 | 0.091823 | 0.116226   | 0.066293 | 0.089312 | 0.085971  | 0.135842 | 0.07966  |
| 24 | 1         | 1        | 1       | 0.655197 | 0.421908 | 0.626332 | 0.556711   | 0.539614 | 0.523042 | 1.013959  | 1.270151 | 1.193336 |

F

|    | Scr      |          |         | Scr + thymidine |          |          | DLL4 KD  |          |          | DLL4 KD + thymidine |          |          |
|----|----------|----------|---------|-----------------|----------|----------|----------|----------|----------|---------------------|----------|----------|
| 0  | 0.064704 | 0.098755 | 0.06527 | 0.089003        | 0.085971 | 0.135842 | 0.116226 | 0.066293 | 0.123279 | 0.085971            | 0.135842 | 0.067218 |
| 24 | 1        | 1        | 1       | 0.832199        | 1.013959 | 1.270151 | 0.390935 | 0.267016 | 0.515842 | 0.82932             | 0.752623 | 0.803942 |
